# Supplementary material
Source: MDPI journal article supplement (https://www.mdpi.com/2304-6740/6/2/45)

# checkCIF/PLATON report

Structure factors have been supplied for datablock(s) FPR841X1

THIS REPORT IS FOR GUIDANCE ONLY. IF USED AS PART OF A REVIEW PROCEDURE FOR PUBLICATION, IT SHOULD NOT REPLACE THE EXPERTISE OF AN EXPERIENCED CRYSTALLOGRAPHIC REFEREE.

No syntax errors found.      CIF dictionary      Interpreting this report

## Datablock: FPR841X1

---

Bond precision:    C-C = 0.0074 A

Wavelength=0.71073

Cell:                a=15.8351(14)      b=23.865(2)                c=19.0098(19)  
                      alpha=90                beta=101.191(4)          gamma=90  
Temperature:        150 K

|                | Calculated                          | Reported              |
|----------------|-------------------------------------|-----------------------|
| Volume         | 7047.3(11)                          | 7047.4(11)            |
| Space group    | P 21/c                              | P 21/c                |
| Hall group     | -P 2ybc                             | -P 2ybc               |
| Moiety formula | C51 H45 Dy F18 O10 S4,<br>2(C6 H14) | C63 H73 Dy F18 O10 S4 |
| Sum formula    | C63 H73 Dy F18 O10 S4               | C63 H73 Dy F18 O10 S4 |
| Mr             | 1622.96                             | 1622.95               |
| Dx,g cm-3      | 1.530                               | 1.530                 |
| Z              | 4                                   | 4                     |
| Mu (mm-1)      | 1.280                               | 1.280                 |
| F000           | 3292.0                              | 3292.0                |
| F000'          | 3295.37                             |                       |
| h,k,lmax       | 20,30,24                            | 20,30,24              |
| Nref           | 16176                               | 16127                 |
| Tmin,Tmax      | 0.732,0.825                         | 0.684,0.825           |
| Tmin'          | 0.657                               |                       |

Correction method= # Reported T Limits: Tmin=0.684 Tmax=0.825

AbsCorr = MULTI-SCAN

Data completeness= 0.997

Theta(max)= 27.484

R(reflections)= 0.0436( 12302)

wR2(reflections)= 0.1141( 16127)

S = 0.967

Npar= 813

---

The following ALERTS were generated. Each ALERT has the format

**test-name\_ALERT\_alert-type\_alert-level.**

Click on the hyperlinks for more details of the test.

## Alert level B

PLAT910\_ALERT\_3\_B Missing # of FCF Reflection(s) Below Theta(Min). 23 Note

## Alert level C

PLAT213\_ALERT\_2\_C Atom F2 has ADP max/min Ratio ..... 3.6 prolat  
 PLAT213\_ALERT\_2\_C Atom F3 has ADP max/min Ratio ..... 3.4 prolat  
 PLAT213\_ALERT\_2\_C Atom F9 has ADP max/min Ratio ..... 3.7 prolat  
 PLAT213\_ALERT\_2\_C Atom C17 has ADP max/min Ratio ..... 3.1 prolat  
 PLAT220\_ALERT\_2\_C Non-Solvent Resd 1 C Ueq(max)/Ueq(min) Range 5.6 Ratio  
 PLAT222\_ALERT\_3\_C Non-Solv. Resd 1 H Uiso(max)/Uiso(min) Range 7.2 Ratio  
 PLAT242\_ALERT\_2\_C Low 'MainMol' Ueq as Compared to Neighbors of C32 Check  
 PLAT360\_ALERT\_2\_C Short C(sp3)-C(sp3) Bond C57 - C58 . 1.42 Ang.  
 PLAT360\_ALERT\_2\_C Short C(sp3)-C(sp3) Bond C58 - C59 . 1.41 Ang.  
 PLAT360\_ALERT\_2\_C Short C(sp3)-C(sp3) Bond C59 - C60 . 1.41 Ang.  
 PLAT360\_ALERT\_2\_C Short C(sp3)-C(sp3) Bond C60 - C61 . 1.37 Ang.  
 PLAT360\_ALERT\_2\_C Short C(sp3)-C(sp3) Bond C61 - C62 . 1.42 Ang.  
 PLAT410\_ALERT\_2\_C Short Intra H...H Contact H59A ..H60A 1.98 Ang.  
 PLAT790\_ALERT\_4\_C Centre of Gravity not Within Unit Cell: Resd. # 1 Note  
                   C51 H45 Dy F18 O10 S4  
 PLAT911\_ALERT\_3\_C Missing FCF Refl Between Thmin & STh/L= 0.600 2 Report  
 PLAT971\_ALERT\_2\_C Check Calcd Resid. Dens. 1.24A From C33 1.52 eA-3  
 PLAT977\_ALERT\_2\_C Check Negative Difference Density on H61A -0.40 eA-3  
 PLAT978\_ALERT\_2\_C Number C-C Bonds with Positive Residual Density. 0 Info

## Alert level G

PLAT002\_ALERT\_2\_G Number of Distance or Angle Restraints on AtSite 12 Note  
 PLAT004\_ALERT\_5\_G Polymeric Structure Found with Maximum Dimension 1 Info  
 PLAT042\_ALERT\_1\_G Calc. and Reported MoietyFormula Strings Differ Please Check  
 PLAT083\_ALERT\_2\_G SHELXL Second Parameter in WGHT Unusually Large 23.63 Why ?  
 PLAT171\_ALERT\_4\_G The CIF-Embedded .res File Contains EADP Records 2 Report  
 PLAT172\_ALERT\_4\_G The CIF-Embedded .res File Contains DFIX Records 4 Report  
 PLAT174\_ALERT\_4\_G The CIF-Embedded .res File Contains FLAT Records 2 Report  
 PLAT176\_ALERT\_4\_G The CIF-Embedded .res File Contains SADI Records 4 Report  
 PLAT242\_ALERT\_2\_G Low 'MainMol' Ueq as Compared to Neighbors of C36 Check  
 PLAT242\_ALERT\_2\_G Low 'MainMol' Ueq as Compared to Neighbors of C40 Check  
 PLAT242\_ALERT\_2\_G Low 'MainMol' Ueq as Compared to Neighbors of C41 Check  
 PLAT242\_ALERT\_2\_G Low 'MainMol' Ueq as Compared to Neighbors of C45 Check  
 PLAT242\_ALERT\_2\_G Low 'MainMol' Ueq as Compared to Neighbors of C46 Check  
 PLAT242\_ALERT\_2\_G Low 'MainMol' Ueq as Compared to Neighbors of C50 Check  
 PLAT344\_ALERT\_2\_G Unusual sp3 Angle Range in Solvent/Ion for C60 Check  
 PLAT344\_ALERT\_2\_G Unusual sp3 Angle Range in Solvent/Ion for C61 Check  
 PLAT720\_ALERT\_4\_G Number of Unusual/Non-Standard Labels ..... 1 Note  
 PLAT860\_ALERT\_3\_G Number of Least-Squares Restraints ..... 42 Note  
 PLAT912\_ALERT\_4\_G Missing # of FCF Reflections Above STh/L= 0.600 26 Note  
 PLAT913\_ALERT\_3\_G Missing # of Very Strong Reflections in FCF .... 2 Note

0 **ALERT level A** = Most likely a serious problem - resolve or explain

1 **ALERT level B** = A potentially serious problem, consider carefully

18 **ALERT level C** = Check. Ensure it is not caused by an omission or oversight

20 **ALERT level G** = General information/check it is not something unexpected

1 ALERT type 1 CIF construction/syntax error, inconsistent or missing data

25 ALERT type 2 Indicator that the structure model may be wrong or deficient  
5 ALERT type 3 Indicator that the structure quality may be low  
7 ALERT type 4 Improvement, methodology, query or suggestion  
1 ALERT type 5 Informative message, check

---

---

It is advisable to attempt to resolve as many as possible of the alerts in all categories. Often the minor alerts point to easily fixed oversights, errors and omissions in your CIF or refinement strategy, so attention to these fine details can be worthwhile. In order to resolve some of the more serious problems it may be necessary to carry out additional measurements or structure refinements. However, the purpose of your study may justify the reported deviations and the more serious of these should normally be commented upon in the discussion or experimental section of a paper or in the "special\_details" fields of the CIF. checkCIF was carefully designed to identify outliers and unusual parameters, but every test has its limitations and alerts that are not important in a particular case may appear. Conversely, the absence of alerts does not guarantee there are no aspects of the results needing attention. It is up to the individual to critically assess their own results and, if necessary, seek expert advice.

### **Publication of your CIF in IUCr journals**

A basic structural check has been run on your CIF. These basic checks will be run on all CIFs submitted for publication in IUCr journals (*Acta Crystallographica*, *Journal of Applied Crystallography*, *Journal of Synchrotron Radiation*); however, if you intend to submit to *Acta Crystallographica Section C* or *E* or *IUCrData*, you should make sure that full publication checks are run on the final version of your CIF prior to submission.

### **Publication of your CIF in other journals**

Please refer to the *Notes for Authors* of the relevant journal for any special instructions relating to CIF submission.

---

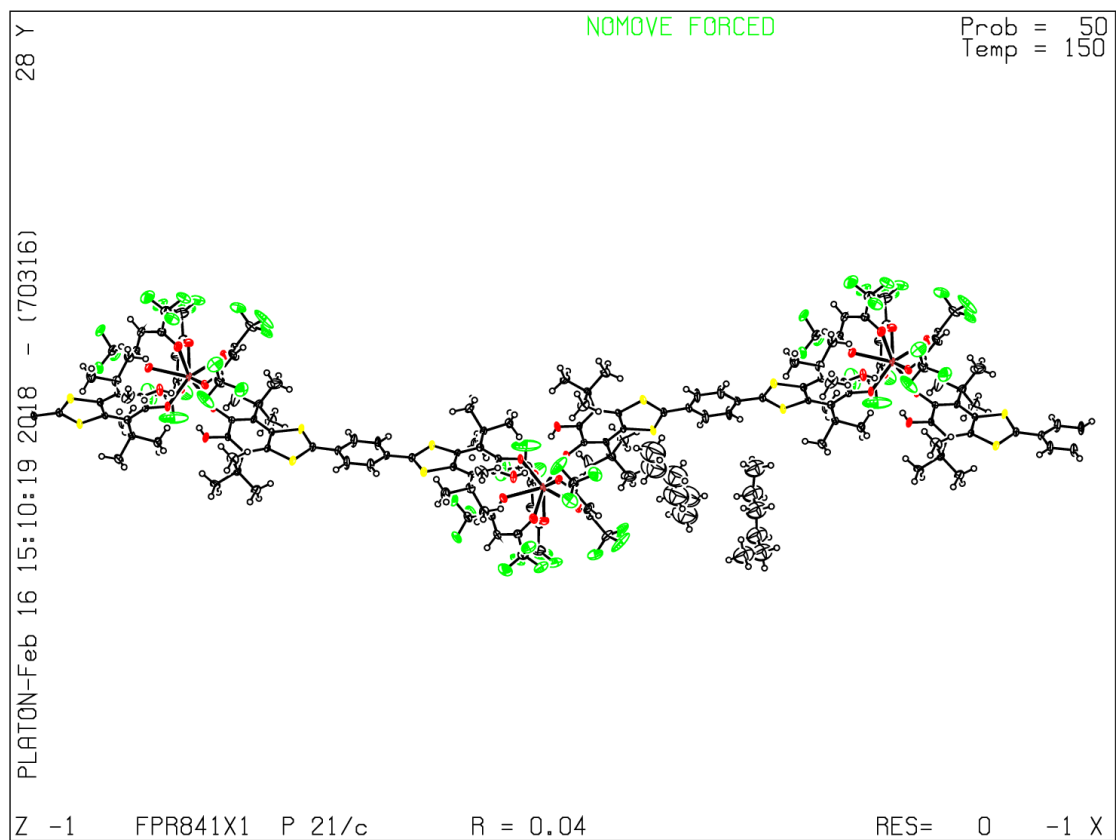

Supplement: s1 [file s1]
