# Supplementary material
Source: MDPI journal article supplement (https://www.mdpi.com/2304-6740/6/2/45)
Supplement: s1 [file s1]

# Supplementary Materials: Field-Induced Dysprosium Single-Molecule Magnet Involving a Fused *o*-Quinone-Extended-Tetrathiafulvalene-*o*-Quinone Bridging Triad

Jessica Flores Gonzalez, Olivier Cador, Lahcène Ouahab, Sergey Norkov, Viacheslav Kuropatov \* and Fabrice Pointillart \*

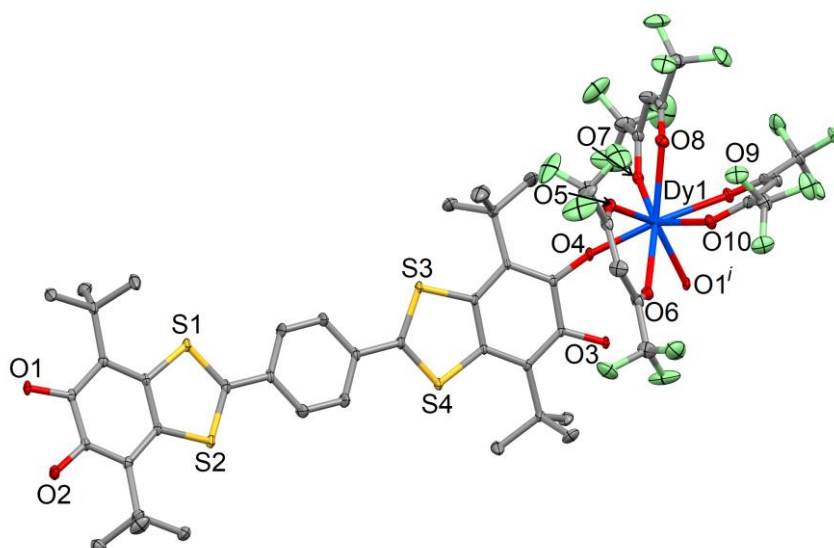

**Figure S1.** ORTEP view of the asymmetric unit of **1**. Thermal ellipsoids are drawn at 30% probability. Hydrogen atoms and solvent molecules of crystallization are omitted for clarity.

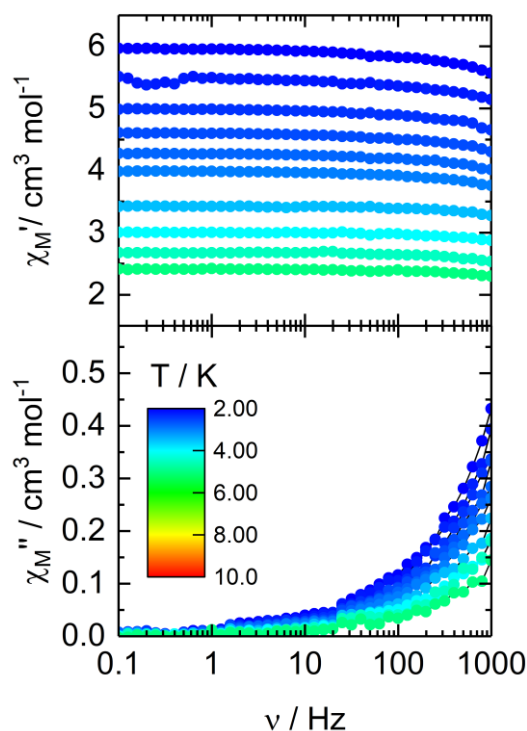

**Figure S2.** Frequency dependence of the in-phase (top) and out-of-phase (bottom) signal of the magnetic susceptibility measured under a zero DC applied magnetic field.

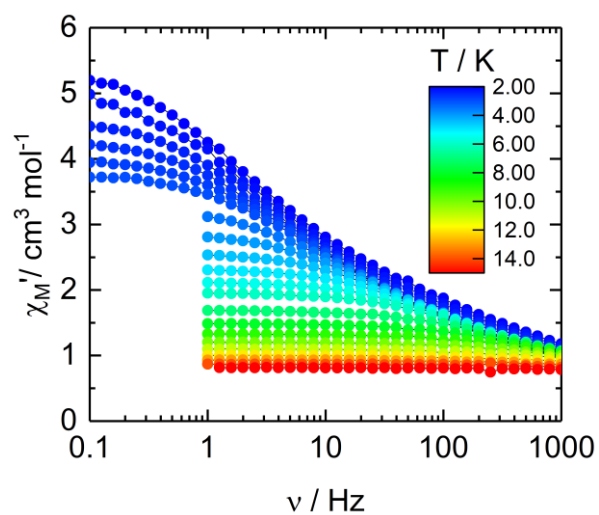

**Figure S3.** Frequency dependence of the in-phase signal of the magnetic susceptibility measured under a DC applied magnetic field of 1200 Oe.

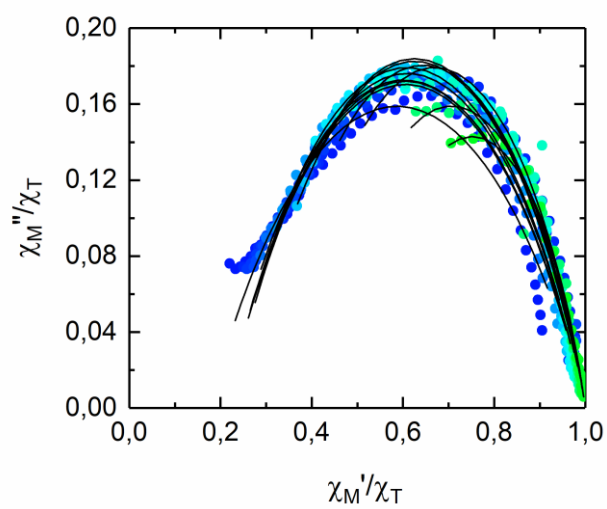

**Figure S4.** Normalized Cole–Cole plots for **1** at several temperatures between 2 and 8 K.
